# Supplementary material for: A novel complement-fixing IgM antibody targeting GPC1 as a useful immunotherapeutic strategy for the treatment of pancreatic ductal adenocarcinoma
Source: Springer Nature journal article supplement (doi:10.1186/s12967-023-04745-9), 2023-11-28
Supplement: MOESM1 [file 26368986]

1 *Additional information*

2 **A novel complement-fixing IgM antibody targeting GPC1 for the treatment of**  
3 **pancreatic ductal adenocarcinoma**

4  
5 **Description**

6  
7 **1 Additional methods**

8 **2 Additional tables**

9 **3 Additional figure legends**

10 **4 Additional figures**

## 34 **1 Additional methods**

35

### 36 **1.1 mAb purification**

37 The hybridoma supernatant was collected twice weekly, tested for productivity and specificity and  
38 finally the AT101 was purified. Purification was performed using Hitrap IgM Purification HP affinity  
39 chromatography (Cytiva, United Kingdom). The supernatant was filtered with a 0.45 µm filter before  
40 purification. The following buffers were used for purification: binding buffer 20 mM sodium  
41 phosphate, 0.8 M (NH<sub>4</sub>)<sub>2</sub>SO<sub>4</sub>, pH 7.5; elution buffer 20 mM sodium phosphate, pH 7.5; regeneration  
42 buffer 20 mM sodium phosphate, pH 7.5 with 30% isopropanol. The column was washed with 5  
43 column volumes of each buffer and equilibrated with 5 column volumes of the binding buffer. The  
44 sample was added to the column with a syringe. The unbound sample was washed with 15 column  
45 volumes of the binding buffer. AT101 was eluted with 12 column volumes of elution buffer. Finally,  
46 the column was regenerated with 7 column volumes of regeneration buffer. To replace the elution  
47 buffer, dialysis was performed in PBS using a cellulose dialysis membrane with a cut-off of 14000  
48 Da (Merck, Germany).

### 49 **1.2 SDS PAGE**

50 The purified AT101 was resuspended in reducing or nonreducing sample buffer (Tris 0.35 M pH 6.8,  
51 30% glycerol, 10% SDS, 0.1% bromophenol blue, each with or without 5% 2-mercaptoethanol) and  
52 boiled for 5 minutes. Samples were loaded into a sodium dodecyl sulphate – polyacrylamide gel  
53 electrophoresis (SDS-PAGE, 12% acrylamide) and run in Biorad vertical electrophoresis chambers  
54 25 (Biorad, Italy) in SDS buffer (2.5 mM Tris; 25 mM glycine pH 8.3 and 0.01% SDS). Proteins were  
55 visualized by Coomassie staining: the gel was stained for 2-3 hours with a solution of 0.1% Brilliant  
56 blue G250 in 30% methanol and 10% acetic acid, and proteins were visualized after destaining with  
57 30% methanol and 10% acetic acid.

### 58 **1.3 ELISA**

59 To confirm binding of the anti-GPC1 antibody AT101, wells (Corning-Costar, MA, USA) were first  
60 coated with GPC1 (100 ng/well, LSBio, Seattle, WA, USA) overnight (O/N) at 4°C. At the end of  
61 incubation, wells were blocked with 2% milk in PBS (Euroclone S.p.A, Italy) for 30 minutes at room  
62 temperature (RT). Then, 500 ng of AT101 were added to the wells and incubated for 1 hour at RT.  
63 Serum from mice immunized with GPC1 (1:100, Takis S.r.l., Italy) was used as positive control. The  
64 negative control (CTRL-) was performed by only using the goat anti-mouse IgG/IgM antibody  
65 conjugated with alkaline phosphatase (AP) without AT101. To remove the excess of unbound  
66 antibody, three washes with PBS-TWEEN20 0.1% and three washes with PBS were performed. To  
67 detect binding of AT101 to GPC1, a goat anti-mouse IgG/IgM antibody conjugated to alkaline  
68 phosphatase (AP) was used (Sigma-Aldrich, Italy, Cat. No. SAB3700987). Bound antibodies were

69 detected by adding the phosphatase substrate para-nitrophenyl phosphate (pNPP, Sigma-Aldrich,  
70 Italy) to the wells. Absorbance was measured at 405 nm using the Tecan M200 Infinite® Pro  
71 Microplate Reader (Tecan Life Sciences, Switzerland). ~~During data elaboration the negative control~~  
72 ~~was subtracted from the value of absorbance.~~

#### 73 **1.4 Immunofluorescence**

74 Cells were seeded at a density of 25000 cells over Deckglaser cover glasses 18 mm (Marienfeld,  
75 Germany) and cultured o/n. The day after, cells were fixed with paraformaldehyde solution 4% in  
76 phosphate buffer solution (PBS-PFA) (Sigma-Aldrich, Italy) and washed with 0.1 M of glycine  
77 (Sigma-Aldrich, Italy) and then with PBS without calcium and magnesium (Euroclone S.p.A., Italy).  
78 After fixation, non-specific binding sites were blocked with PBS Bovine Serum Albumine (BSA) 5%  
79 (Sigma-Aldrich, Italy) for 1 h at RT. After the blocking, cells were incubated with primary antibodies  
80 diluted in PBS BSA 1% for 1 h at RT. Cells were washed twice with PBS and incubated with the  
81 secondary antibody for 1 h at RT. Cells were then washed in PBS and incubated for 5 minutes with  
82 DAPI (Sigma-Aldrich, Italy) and washed with PBS, with distilled water and mounted using the  
83 FluorSave™ mounting medium (Merck, Germany) to Superfrost® Microscope Slides (Thermo  
84 Scientific, Thermo Fisher Scientific, Italy). Images were acquired using the Nikon Eclipse Ti-U  
85 microscope (Nikon Europe B.V.).

86 Organs and BXPC3 tumors from xenograft murine models were embedded into Killik O.C.T. (OCT)  
87 medium (Bio-Optica S.p.A., Italy) and maintained at -80 °C. A cryostat (Thermo Electron Corporation,  
88 MA, USA) was utilized to cut organs and tumors into slices of 7 µm, slices were subsequently  
89 mounted into SuperFrost® Plus (Fisher Scientific, Thermo Fisher Scientific, Italy) glass slides and  
90 stored at -80 °C. For immunofluorescence (IF), samples were fixed for 10 minutes with cold PBS-  
91 PFA, washed with PBS and blocked using a solution of 2% BSA, 0.25% casein from bovine milk  
92 (Sigma-Aldrich, Italy), and 0.1% gelatine from cold water fish skin (Sigma-Aldrich, Italy) in PBS for 1  
93 h at RT. Slices were then incubated with primary antibodies diluted into blocking solution for 1 h at  
94 RT, then washed with blocking solution and incubated with secondary antibodies in blocking solution  
95 for 1 h at RT. Samples were further washed in PBS and incubated with DAPI 5 min at RT. Samples  
96 were washed twice with PBS and then with distilled water. Samples were mounted using  
97 FluorSave™ on high precision microscope cover glasses (Marienfeld, Germany). Images were  
98 acquired using the Nikon Eclipse Ti-U microscope.

#### 99 **1.5 Flow cytometry**

100 For flow cytometry analysis, 300000 cells were blocked using PBS plus 2% BSA and then incubated  
101 with primary antibody diluted in the same blocking solution for 1 hour at RT under shaking. Cells  
102 were then washed twice with PBS plus 2% BSA and incubated with secondary antibody diluted in  
103 the same blocking solution for 1 hour at RT. The samples were washed and then resuspended into

104 PBS plus 2% BSA and 1% PFA. Samples were acquired using BD FACSCanto™II Cell Analyzer  
105 (Becton, Dickinson and Company, NJ, USA). Primary antibodies employed were: anti-GPC1  
106 (Thermo Fisher Scientific, Italy, Cat. No. PA5-28055); AT101 25 µg/ml. Secondary antibodies  
107 employed were: anti-mouse IgM 488 conjugated (Bethyl, Fortis Life Science, MA, USA, Cat. No.  
108 A90-201D2) diluted 1:250; anti-rabbit IgG 488 conjugated (Bethyl, Fortis Life Science, MA, USA,  
109 Cat. No. A120-212D2) diluted 1:100. Data were analyzed using BD FACSDiva Software.

## 110 **1.6 Labeling with cyanine 5.5**

111 For the *in-vivo* biodistribution study, AT101 was conjugated with cyanine 5.5 (Cy5.5) (Cytiva, United  
112 Kingdom, Cat. No. PA25501), a dye that produces an intense signal in the near infrared region of  
113 the spectrum. One mg of AT101 was added to the Cy5.5 vial and the reaction was incubated for 30  
114 minutes at RT, with additional mixing every 10 minutes. The labelled AT101 was separated from the  
115 excess free Cy5.5 by dialysis in PBS using a cellulose dialysis membrane with a cutoff of 14000 Da  
116 (Merck, Germany). Quantification of Cy5.5 was performed using a spectrophotometer (Cary 100 UV-  
117 VIS, Agilent) according to the guidelines in the protocol “Amersham fluorolink Cy5.5 monofunctional  
118 dye PA25501”.

## 119 **1.7 Hematoxylin Eosin staining**

120 The tumor masses were collected and embedded in OCT. The frozen organs were then cut with the  
121 cryostat as described in the section “Immunofluorescence”. Tumor slices were fixed in cold PFA-  
122 PBS for 10 minutes, washed in distilled water for 1 minute and stained with hematoxylin solution  
123 (Merck, Germany) for 3 minutes. Before eosin staining (Bio-Optica, Italy) for 45 seconds, the slices  
124 were washed in distilled water for 1 minute and incubated with 95% ethanol for 1 minute.  
125 Subsequently, the slices were dehydrated by serial incubation with ethanol 95% for 1 minute and by  
126 2 incubations with ethanol 100%. Finally, the slices were incubated with xylene for 2 minutes and  
127 the cover glasses were mounted with Entellan™ (Merck, Germany). For IF, the sections were treated  
128 as described in the section “Immunofluorescence”.

## 129 **1.8 Statistical analyses**

130 Statistical analyses were performed in RStudio (v4.0.5). The unpaired Student’s t-test was used to  
131 calculate statistical difference between the means of two data sets. Survival function estimates  
132 between treatment groups were calculated with the Kaplan-Meier estimator using the package  
133 “survival”(v3.2-10); survival curves were plotted by Kaplan-Meier curves using the package  
134 “survminer”(v0.4.9). The log-rank test was used to calculate the p-values of the survival difference  
135 between the treatment groups using the package “survival” (v3.2-10). The comparison between the  
136 two groups (tumor growth curves) was performed using the 1-way analysis of variance test.  $P < 0.05$   
137 was considered statistically significant.

138 **2 Additional Tables**

139

140 **Table 1.** Primers employed for sequencing of VL gene

| <b>Mouse VL specific primers 5' to 3'</b> |                                              |
|-------------------------------------------|----------------------------------------------|
| 1                                         | AGCAAGCGGCGCGCATGCCGAYATCCAGCTGACTCAGC       |
| 2                                         | AGCAAGCGGCGCGCATGCCGAYATTGTTCTCWCCCAGTC      |
| 3                                         | AGCAAGCGGCGCGCATGCCGAYATTKTGMTVACTCAGTC      |
| 4                                         | AGCAAGCGGCGCGCATGCCGAYATTGTGYTRACACAGTC      |
| 5                                         | AGCAAGCGGCGCGCATGCCGAYATTGTRATGACMCAGTC      |
| 6                                         | AGCAAGCGGCGCGCATGCCGAYATTMAGATRAMCCAGTC      |
| 7                                         | AGCAAGCGGCGCGCATGCCGAYATTCAGATGAYDCAGTC      |
| 8                                         | AGCAAGCGGCGCGCATGCCGAYATYCAGATGACACAGA       |
| 9                                         | AGCAAGCGGCGCGCATGCCGAYATTGTTCTCAWCCAGTC      |
| 10                                        | AGCAAGCGGCGCGCATGCCGAYATTGWGTCSACCCAATC      |
| 11                                        | AGCAAGCGGCGCGCATGCCGAYATTSTRATGACCCARTC      |
| 12                                        | AGCAAGCGGCGCGCATGCCGAYRTTKTGATGACCCARAC      |
| 13                                        | AGCAAGCGGCGCGCATGCCGAYATTGTGATGACBCAGKC      |
| 14                                        | AGCAAGCGGCGCGCATGCCGAYATTGTGATAACYCAGGA      |
| 15                                        | AGCAAGCGGCGCGCATGCCGAYATTGTGATGACCCAGWT      |
| 16                                        | AGCAAGCGGCGCGCATGCCGAYATTGTGATGACACAACC      |
| 17                                        | AGCAAGCGGCGCGCATGCCGACATCGAGCTCACCCAGTCTC    |
| 18                                        | AGCAAGCGGCGCGCATGCCGACAGGCTGTTGTGACTCAGGAATC |
| <b>Mouse K primer 5' to 3'</b>            |                                              |
| 1                                         | CAGTTGGTGCAGCATCAGCCCG                       |

141

142

143

144

145

146

147

148

149

150 **Table 2.** Primers employed for sequencing of VH gene

| <b>Mouse VH specific primers 5' to 3'</b> |                                           |
|-------------------------------------------|-------------------------------------------|
| 1                                         | TTATCCTCGAGCGGTACCGAKGTRMAGCTTCAGGAGTC    |
| 2                                         | TTATCCTCGAGCGGTACCGAGGTBCAGCTBCAGCAGTC    |
| 3                                         | TTATCCTCGAGCGGTACCCAGGTGCAGCTGAAGSASTC    |
| 4                                         | TTATCCTCGAGCGGTACCGAGGTCCARCTGCAACARTC    |
| 5                                         | TTATCCTCGAGCGGTACCCAGGTYCAGCTBCAGCARTC    |
| 6                                         | TTATCCTCGAGCGGTACCCAGGTYCARCTGCAGCAGTC    |
| 7                                         | TTATCCTCGAGCGGTACCGAGGTGAASSTGGTGGAAAT    |
| 8                                         | TTATCCTCGAGCGGTACCGAVGTGAWGYTGGYGGAGTC    |
| 9                                         | TTATCCTCGAGCGGTACCGAGGTGCAGSKGGTGGAGTC    |
| 10                                        | TTATCCTCGAGCGGTACCGAKGTGCAMCTGGTGGAGTC    |
| 11                                        | TTATCCTCGAGCGGTACCGAGGTGAAGCTGATGGARTC    |
| 12                                        | TTATCCTCGAGCGGTACCGAGGTGCARCTTGTTGAGTC    |
| 13                                        | TTATCCTCGAGCGGTACCGARGTRAAGCTTCTCGACTC    |
| 14                                        | TTATCCTCGAGCGGTACCGAAGTGAARSTTGAGGAGTC    |
| 15                                        | TTATCCTCGAGCGGTACCCAGGTACTCTRAAAGWGTSTG   |
| 16                                        | TTATCCTCGAGCGGTACCCAGGTCCAACVCAGCARCC     |
| 17                                        | TTATCCTCGAGCGGTACCGATGTGAACTTGGAAGTGTC    |
| 18                                        | TTATCCTCGAGCGGTACCGAGGTGAAGGTCATCGAGTC    |
| 19                                        | TTATCCTCGAGCGGTACCSAGGTSMARCTGCAGSAGTCWGG |
| <b>Mouse H primer 5' to 3'</b>            |                                           |
| 1                                         | GATTGGTTTGCCGCTAGCGACATTTGGGAAGGACTGA     |

151

152 **Table 3.** Aminoacid sequences of VL and VH chains of AT101

153 **Heavy chain variable region:**

|                                                                  |
|------------------------------------------------------------------|
| QVQLQQSDAELVKPGASVKISCKASGYTFTDHAHWWVKQKPEQGLEWIGYISPGNGDIK<br>Y |
| NEKFKGKATLTADKSSSTAYMQLNSLTSEDSAVYFCKRYAYWGQGLTVTSA              |

154

155 **Light chain variable region:**

|                                                                  |
|------------------------------------------------------------------|
| DVLMTQTPLSLPVSLGDQASISCRSSQSIVHSNGNTYLEWYLQKPGQSPKLLIYKVSNR<br>F |
| SGVPDRFSGSGSGTDFTLKISRVEAEDLGVYYCFQGSHVPWTFGGGTKLEIKP            |

156

157

158

159 **3 Additional figure legends**

160

161 **Figure A1.** Immunofluorescence analysis to evaluate GPC1 expression in BXPC3 and Jurkat using  
162 AT101 and the commercial anti-GPC1 antibody as positive control. In red the signal related to GPC1  
163 protein is reported and in blue the signal related to the nuclei is reported. Scale bar: 25  $\mu\text{m}$ .

164

165 **Figure A2.** Hematoxylin eosin staining to evaluate the possible presence of tissue damage. Purple  
166 blue refers to the nuclei, pink refers to the cytoplasm and the extracellular matrix. Scale bar: 100  
167  $\mu\text{m}$ .

168

169

170

171

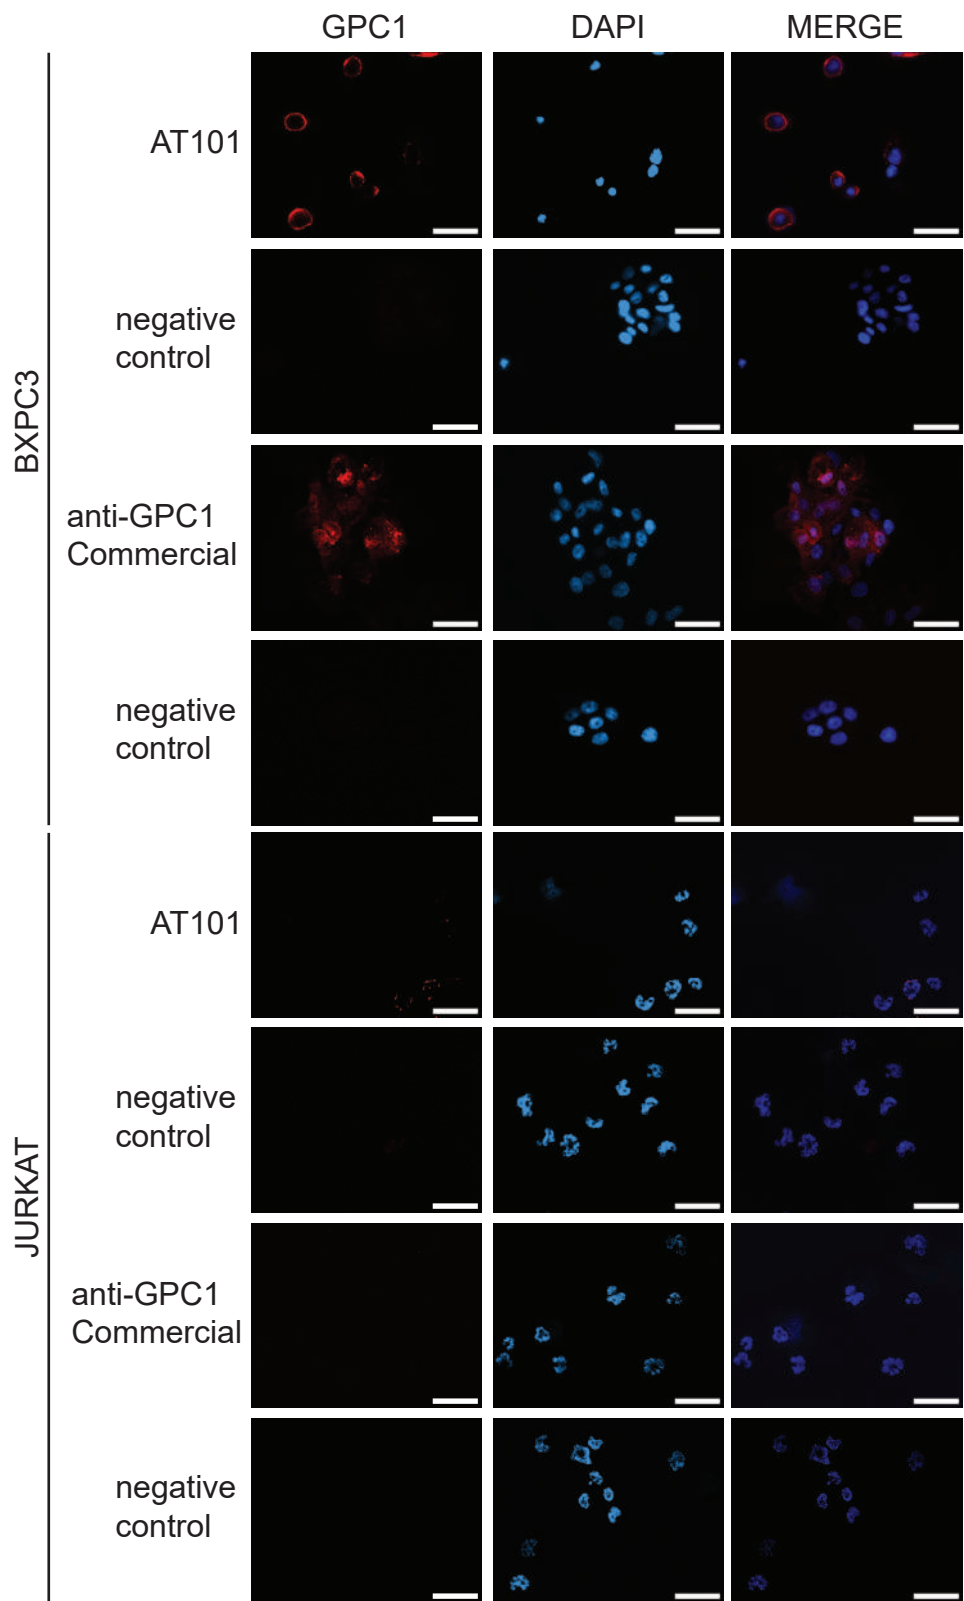

FIGURE S1



H&E  
staining

AT101

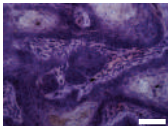

unspecific  
IgM

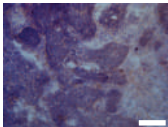

FIGURE S2
